# Supplementary material for: Method for inducing experimental pneumococcal meningitis in outbred mice
Source: PubMed Central journal article supplement (PMC524167; doi:10.1186/1471-2180-4-36), 2004-09-22
Supplement: 1471-2180-4-36-S1.pdf [file 1471-2180-4-36-S1.pdf]

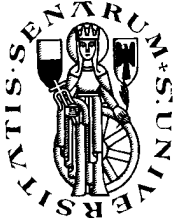

Università degli Studi di Siena  
Dipartimento di Biologia Molecolare - Sezione di Microbiologia

Siena, July 28, 2004

**TO WHOM IT MAY CONCERN**

On the 1<sup>st</sup> of October 2003, the University Hospital of Siena, the Faculty of Medicine and Surgery, and the Local Ethical Committee gave the authorisation to the Laboratory of Molecular Microbiology and Biotechnology (LA.M.M.B.) to perform *in vivo* experiments based on the use of animal models of infection by *Streptococcus pneumoniae* (Prot. no 754/03, 12.9.03). The use of experimental murine models of pneumococcal pneumonia, sepsis and meningitis in mice was thereby approved. The authorisation allows the use of 600 mice and it is valid until the 30<sup>th</sup> of September 2006 (36 months).

Sincerely yours,

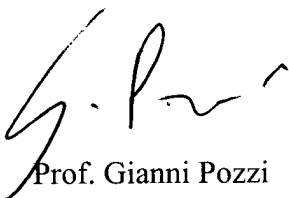

Prof. Gianni Pozzi

Responsible of LA.M.M.B.

Tel.: +39-0577-233430

E-mail: [pozzi@unisi.it](mailto:pozzi@unisi.it)



Prof. Gian Maria Rossolini

Department Head

Tel.: +39-0577-233455

E-mail: [rossolini@unisi.it](mailto:rossolini@unisi.it)
